# Supplementary material for: DDX3 modulates the tumor microenvironment via its role in endoplasmic reticulum-associated translation
Source: PubMed Central journal article supplement — iScience. 2021 Sep 4;24(9):103086. doi: 10.1016/j.isci.2021.103086 (PMC8449240; doi:10.1016/j.isci.2021.103086), 2021-09-04
Supplement: mmc1.pdf [file mmc1.pdf]

**iScience, Volume 24**

**Supplemental information**

**DDX3 modulates the tumor microenvironment  
via its role in endoplasmic  
reticulum-associated translation**

**Hung-Hsi Chen, Hsin-I Yu, Rudy Rudy, Sim-Lin Lim, Yi-Fen Chen, Shu-Hsing Wu, Shu-Chun Lin, Muh-Hwa Yang, and Woan-Yuh Tarn**

## SUPPLEMENTARY TABLES

**Table S1. List of the Top Growth Factors or Cytokines That Were Down-Regulated by DDX3 Knockdown (Related to Figure 1)**

| Regulator | RIBOseq Log2 (siD#1/siC) | Molecular Type | Activation State | z-score | p-value of overlap | TE Log2 (siD#1/siC) |
|-----------|--------------------------|----------------|------------------|---------|--------------------|---------------------|
| AREG      | -3.1518                  | Growth factor  | Inhibited        | -2.359  | 1.75E-04           | -0.80479            |
| NRG1      | -2.21476                 | Growth factor  | Inhibited        | -3.087  | 7.34E-10           | -0.53487            |
| EDN1      | -2.08081                 | Cytokine       | Inhibited        | -2.945  | 1.64E-05           | -0.82668            |
| IL1A      | -2.05664                 | Cytokine       | Inhibited        | -2.389  | 4.93E-03           | -0.71868            |
| IL1B      | -1.84014                 | Cytokine       | Inhibited        | -3.249  | 9.45E-06           | -0.70392            |
| TGFA      | -1.31945                 | Growth factor  | Inhibited        | -2.574  | 5.49E-04           | -1.37732            |

**Table S2. Identification of DDX3-Interacting Partners by Using Immunoprecipitation-Mass Spectrometry (Related to Figure 5)**

Top 10 candidates in each protein bands (Figure S5) are shown.

| Band | TOP10 non-redundant Gene symbol                                                |
|------|--------------------------------------------------------------------------------|
| 1    | ZC3H18, ATXN2, EIF3A, THRAP3, PELP1, DCD, MAP7D1, BCLAF1, TJP2, TJP1           |
| 2    | LARP4, SRPK2, EIF3C, DDX54, SRPK1, YTHDC1, ILF3, NOM1, EIF3B, SND1             |
| 3    | NUFIP2, EIF4B, ZC3HAV1, ZFP91, FXR2, LCA5, NUMB, SPTY2D1, TDRD3, MAP3K20       |
| 4    | DDX3X, SRP68, SRP72, HSPA8, DDX17, PABPC1, DDX5, HSPA5, FXR1, DDX1             |
| 5    | RTCB, TUBB, TUBB4B, IMPDH2, TUBB4A, TUBB3, TUBA1B, SERBP1, TUBA1A, TUBB6       |
| 6    | RPL4, RPL3, YBX1, BYSL, RBM34, EIF3E, LUC7L2, YBX3, FAM98B, TUBB2A             |
| 7    | HNRNPA2B1, NPM1, EIF3I, GAPDH, RPSA, HNRNPA3, APOBEC3A, FYTDD1, RPL15, RPL34   |
| 8    | RPL5, HNRNPA1, RPLP0, PWP1, CCDC59, CCDC137, RACK1, TRA2B, ABT1, FAM60A        |
| 9    | PYCR1, MRPS18B, UTP23, RBM7, TAF15, RPL22, HIST1H1C, FGFBP1, PCDHGC4, C6orf136 |
| 10   | RPL8, RPL7, RPS6, RPL7A, RPS3A, RPS4X, RPS2, CHTOP, ALYREF, RPS3               |
| 11   | RPL18, RPS8, RPL10, RPL13, RPL19, RPL9, RPL14, RPL17, PYCR2, RPL13A            |
| 12   | RPL24, RPS5, RPL18A, RPL11, RPL21, RPL29, RPL23A, RPS9, RPS7, RPL6             |
| 13   | RPL26, RPL28, RPL26L1, RPL32, RPS10, RPS13, RPL12, RPS11, RPL27A, RPS14        |

**Table S3. GO Analysis of Potential DDX3-Interacting Partners Identified by Immunoprecipitation-Mass Spectrometry (Related to Figure 5)**

| Biological process (GO)                                             | Observed count | Background count | P value  |
|---------------------------------------------------------------------|----------------|------------------|----------|
| Translational initiation                                            | 78             | 142              | 8.37E-70 |
| Translation                                                         | 99             | 362              | 1.34E-66 |
| SRP-dependent cotranslational protein targeting to membrane         | 64             | 92               | 5.69E-62 |
| mRNA metabolic process                                              | 114            | 667              | 3.64E-59 |
| Nuclear-transcribed mRNA catabolic process, nonsense-mediated decay | 65             | 118              | 1.94E-58 |
| Peptide metabolic process                                           | 101            | 497              | 4.69E-58 |
| Protein localization to endoplasmic reticulum                       | 65             | 123              | 1.24E-57 |
| Amide biosynthetic process                                          | 100            | 495              | 2.71E-57 |
| Nuclear-transcribed mRNA catabolic process                          | 71             | 191              | 7.43E-55 |
| Ribonucleoprotein complex biogenesis                                | 90             | 409              | 6.51E-54 |

**Table S4. GO Analysis of Potential DDX3-Interacting Partners Identified by SILAC (Related to Figure 5)**

| Biological process (GO)                                             | Observed count | Background count | P value  |
|---------------------------------------------------------------------|----------------|------------------|----------|
| Translational initiation                                            | 45             | 142              | 9.23E-53 |
| Translation                                                         | 49             | 362              | 2.51E-42 |
| SRP-dependent cotranslational protein targeting to membrane         | 34             | 92               | 2.84E-41 |
| Amide biosynthetic process                                          | 52             | 495              | 1.37E-40 |
| Peptide metabolic process                                           | 52             | 497              | 1.42E-40 |
| Nuclear-transcribed mRNA catabolic process, nonsense-mediated decay | 33             | 118              | 4.44E-37 |
| Cellular amide metabolic process                                    | 55             | 732              | 2.21E-36 |
| Establishment of protein localization to organelle                  | 43             | 396              | 1.13E-33 |
| mRNA catabolic process                                              | 35             | 207              | 6.86E-33 |
| Nuclear-transcribed mRNA catabolic process                          | 34             | 191              | 1.40E-32 |

**Table S5. List of shRNA Target Sequences (Related to STAR Methods)**

| shRNA     | Sense target sequence  |
|-----------|------------------------|
| shC       | AACUUUCGCUUAUUGGACUAA  |
| shDDX3    | ACAUUGAGCUUACUCGUUAUA  |
| shAREG    | GACCUCAAUGACACCUACUCU  |
| shSRP9    | GGCAUUCUGAUGGGAACUUGU  |
| shSRP14   | GCACAGUAAAGGGCAUACAUI  |
| shSRP19   | GAAGGCGAAUCCCCAUAAAGUA |
| shSRP54   | GGUAUUGAAUGCUAUGCUIAAA |
| shSRP68   | GAGCUUCUGACCGAUAAUAGA  |
| shSRP72   | GCGCUCUCAAGACCGUCAAU   |
| shALYREF  | GCUUGUCACGUCACAGAUUGA  |
| shATXN2   | GGUUCAUAUACUUAUCAUCAGU |
| shCASC3   | GAACGGUGAGCGGCUAAACAA  |
| shDDX6    | GGUAGGGAUUCUUAAGCUAGA  |
| shDDX42   | GUUCGAUCCAUAAGCAAGUCAU |
| shDDX55   | GGAAGAGUCAUACAUCUAAUUU |
| shEIF2B3  | GCAGUAGUGAUGGCAGUAGGU  |
| shEIF2S3  | GCCCUUAGCCGAAGAGUUGAA  |
| shEIF4E   | GGAAACCACCCUACUCCUAA   |
| shEIF4H   | GAUCUCAGCAUAAGGAGUGUA  |
| shEIF5    | GACGUUGCAAAGGCGCUAAU   |
| shEIF5A   | GUAAGAUCGUCGAGAUGUCUA  |
| shEIF5B   | GAGAAGAGGAAGAACGUAAU   |
| shEIF6    | GUGCUUAUCGCCUGGAUCUAI  |
| shELAVL1  | GAUCAAAGACGCCAACUUGUA  |
| shIGF2BP1 | GCUGGCUCAGUAUGGUACAGU  |
| shLARP4   | GCCAGAAGCAAGGGCUAGUAA  |
| shMETAP2  | GAAGACUGUUCACGCAAGUUA  |
| shSYNCRIP | GACGGUGCAUUGGCAGUUCU   |
| shYBX3    | GAAUAACCCACGGAAAUAUCU  |

**Table S6. List of Primers Used in the Study (Related to STAR Methods)**

| Primer       | Sequence               |
|--------------|------------------------|
| SRP9 qPCR F  | CTGCCGAGAAGCTTTACCTC   |
| SRP9 qPCR R  | GGGCTTCCTTGGCTACCATA   |
| SRP14 qPCR F | AGCTAACATGGATGGGCTGA   |
| SRP14 qPCR R | GTTGTTGCTGCTGTTGTTGG   |
| SRP19 qPCR F | GAAGACCATCGCAGAGGGAA   |
| SRP19 qPCR R | GGCTCCCATCTTCTGTTTG    |
| SRP54 qPCR F | CAGTACGGATGGTGCCAAAG   |
| SRP54 qPCR R | GACATGTCGCCACCTTTGAA   |
| SRP68 qPCR F | CAAGTGCGGTCAGAGAAGTG   |
| SRP68 qPCR R | ACCGTTCAACCAGAGGCTTA   |
| SRP72 qPCR F | ATCTCGTCCGAAACTCCCAA   |
| SRP72 qPCR R | CCAGGTTCTCTGGAACCACT   |
| hRL qPCR F1  | CCAAGCAAGATCATGCGGAA   |
| hRL qPCR R1  | TAACCTCGCCCTTCTCCTTG   |
| hFL qPCR F1  | CTTTCATCTGCCAGGCATCC   |
| hFL qPCR R1  | CACCTTGCCCTCGAAGAATG   |
| AREG qPCR F  | GGTGCTGTCGCTCTTGATAC   |
| AREG qPCR R  | TTCACGCTTCCAGAGTAGG    |
| ACTB qPCR F  | GAGGCACTCTTCCAGCCTT    |
| ACTB qPCR R  | AAGGTAGTTTCGTGGATGCC   |
| GAPDH qPCR F | ATGGGTGTGAACCATGAGAA   |
| GAPDH qPCR R | GTGCTAAGCAGTTGGTGGTG   |
| IL1B qPCR F  | AGCTGAGGAAGATGCTGGTT   |
| IL1B qPCR R  | GTGATCGTACAGGTGCATCG   |
| IL23A qPCR F | AGTCAGTTCTGCTTGCAAAGG  |
| IL23A qPCR R | AGTAGGGAGGCATGAAGCTG   |
| MAF qPCR F   | CTTGCACTTTGCACAGAGGT   |
| MAF qPCR R   | CCTCTTCTGCTTGGCTCTCT   |
| VEGFA qPCR F | ACAAGATCCGCAGACGTGTA   |
| VEGFA qPCR R | TCACATCTGCAAGTACGTTCCG |
| EDN1 qPCR F  | AGACAAACCAGGTCGGAGAC   |
| EDN1 qPCR R  | TGTGGGTCACATAACGCTCT   |
| NRG1 qPCR F  | AACGTCATCTCCAGTGAGCA   |
| NRG1 qPCR R  | GATGCTTTCAGTGTGTCCGT   |
| TGFA qPCR F  | CTGCCATTCTGGGTACGTTG   |
| TGFA qPCR R  | GTGATGGCCTGCTTCTCTG    |
| XBP1 qPCR F  | CAGACTACGTGCACCTCTGC   |
| XBP1 qPCR R  | CTGGGTCCAAGTTGTCCAGAAT |
| CD163 qPCR F | AATTCCTCAGGAGGCCATTC   |
| CD163 qPCR R | TGCTCCATTCAATAGTCCAGG  |
| IL10 qPCR F  | GTGAGCAGGTGAAGAATGC    |
| IL10 qPCR R  | GCCACCCTGATGTCTCAGTT   |

|                    |                                       |
|--------------------|---------------------------------------|
| MRC1 qPCR F        | CAGCGCTTGTGATCTTCATT                  |
| MRC1 qPCR R        | TACCCCTGCTCCTGGTTTTT                  |
| IL1A qPCR F        | TTCAAGGAGAGCATGGTGGT                  |
| IL1A qPCR R        | AAAGGTGCTGACCTAGGCTT                  |
| IL18 qPCR F        | CAGTCTACACAGCTTCGGGA                  |
| IL18 qPCR R        | TGCCACAAAGTTGATGCAAT                  |
| IL12B qPCR F       | GTTTCAGGGCCATTGGACT                   |
| IL12B qPCR R       | GAGATGCCAGAAAAACCAGG                  |
| HLADR qPCR F       | TGGAGTCCCTGTGCTAGGAT                  |
| HLADR qPCR R       | ATAGAACTCGGCCTGGATGA                  |
| NOS2 qPCR F        | GCCAAGAACGTGTTACCAT                   |
| NOS2 qPCR R        | GCCATCCTCACAGGAGAGTT                  |
| CDH1 qPCR F        | GCGTGTGTGACTGTGAAGGG                  |
| CDH1 qPCR R        | GTCCCGGGTGTTCATCCTCTG                 |
| NheI+AREG 5' UTR F | TAT GCTAGC AGACGTTTCGCACACCTGGGT      |
| NheI+AREG 5' UTR R | TAT GCTAGC ATTGGTCCTTCGCAGCGGCG       |
| XhoI+AREG 3' UTR F | TAT CTCGAG CTGAAGATAAAAATTACAGGATATC  |
| NotI+AREG 3' UTR R | TAT GCGGCCGC TTTGGTTAAAAAAGTTTAATGAGC |
| HindIII+AREG CDS F | TAT AAGCTT ACG ATGAGAGCCCCGCTGCTACC   |
| BamHI+AREG CDS R   | TAT GGATCC TGCTATAGCATGTACATTTCCA     |

## SUPPLEMENTARY FIGURE LEGENDS

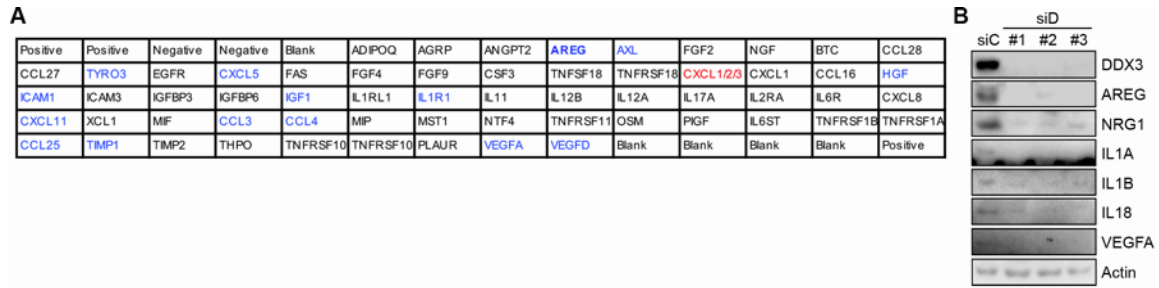

### Figure S1. DDX3 is Required for the Expression of Multiple Growth Factors and Cytokines (Related to Figure 1)

(A) The list of antibodies on the array used in Figure 1B. The proteins of which the signals were downregulated or upregulated by  $\geq 2$ -fold (Figure 1B) are marked as blue and red, respectively.

(B) Immunoblotting of growth factors and cytokines as indicated in the lysates of siC-transfected or siD (#1-3)-transfected SAS cells.

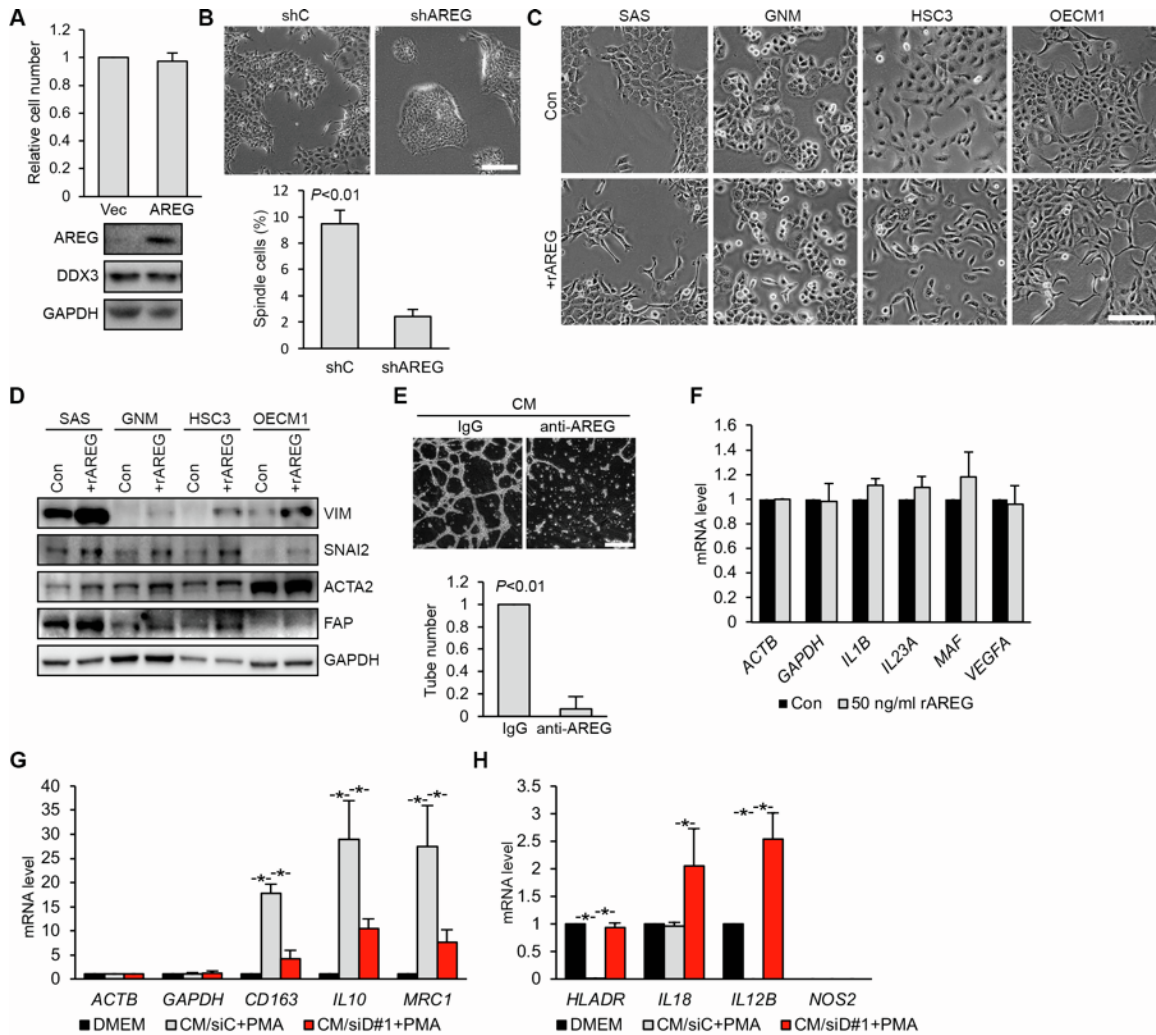

**Figure S2. The Potential of AREG in Promoting Cell Migration, Angiogenesis and Macrophage Differentiation (Related to Figure 2)**

(A) SAS cells were transfected with pP2A (vec) or pP2A-AREG for 72 hours. Bar graph shows relative cell number; average and standard deviation were from three independent experiments. Immunoblotting was performed using antibodies as indicated.

(B) Morphology analysis of cells transfected with shC or shAREG. The scale bar represents 50  $\mu$ m.

(C) Representative images of morphology of indicated cells cultured in control or rAREG-containing medium. The scale bar represents 50  $\mu$ m.

(D) Immunoblotting of the lysates of control or rAREG-treated OSCC cell lines as in panel C with antibodies against indicated proteins.

(E) Angiogenesis assay of EA.hy926 cells cultured in CM of SAS cells treated with 1  $\mu$ g/ml of control IgG or anti-AREG.

(F) RT-qPCR analysis of the indicated mRNAs from THP-1 cells cultured in DMEM with or without 50 ng/ml of rAREG.

(G and H) RT-qPCR analysis of indicated mRNAs from THP-1 cells that were cultured in DMEM or CM of siC or siD#1 SAS cells supplemented with PMA; \* $P < 0.01$ .

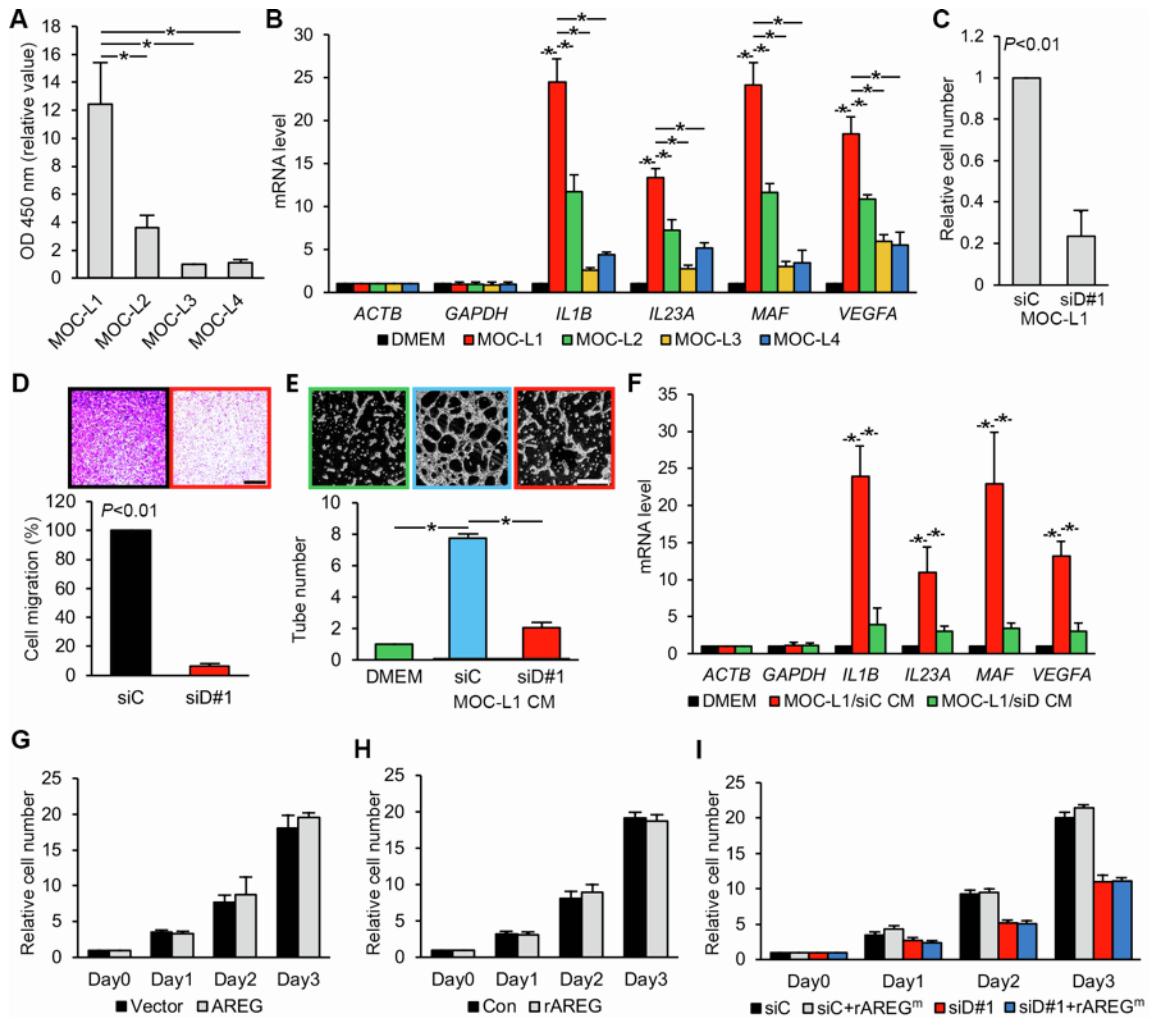

**Figure S3. DDX3 Promotes Cell Growth and Migration of Mouse MOC-L1 Cells and Enhances Their Activity in Remodeling Stromal Cells (Related to Figure 3)**

(A) ELISA assays of mouse AREG protein in CM of indicated lines of mouse OSCC cells.

(B) RT-qPCR analysis of indicated transcripts in THP-1 cells cultured in CM derived from indicated mouse OSCC cells.

(C) Cell growth assays of MOC-L1 cells transfected with siC or siD#1.

(D) Boyden chamber assays of MOC-L1 cells transfected with siC or siD#1. Image and bar graph are analogous to Figure 2B.

(E) Angiogenesis assays of EA.hy296 cells cultured in DMEM or CM of MOC-L1 transfected with siC or siD#1. Image and bar graph are analogous to Figure 2C.

(F) RT-qPCR analysis of indicated transcripts in THP-1 cells that were cultured in DMEM or CM from MOC-L1 transfected with siC or siD#1. Bar graph is analogous to Figure 2D; \* $P < 0.01$ .

(G) MOC-L1 cells were transfected with the control or AREG overexpression vector. The number of cells was counted at different time points as indicated. Bar graph shows the relative cell number of mock or AREG-overexpressed cells at different days, representing cell growth.



(H) Cell growth assay was performed as in panel G, except that MOC-L1 cells were mock treated or treated with 50 ng/ml rAREG<sup>m</sup>.  
 (I) Cell growth assay was performed in mock or DDX3 knockdown-MOC-L1 cells that were treated rAREG<sup>m</sup> as in panel H.

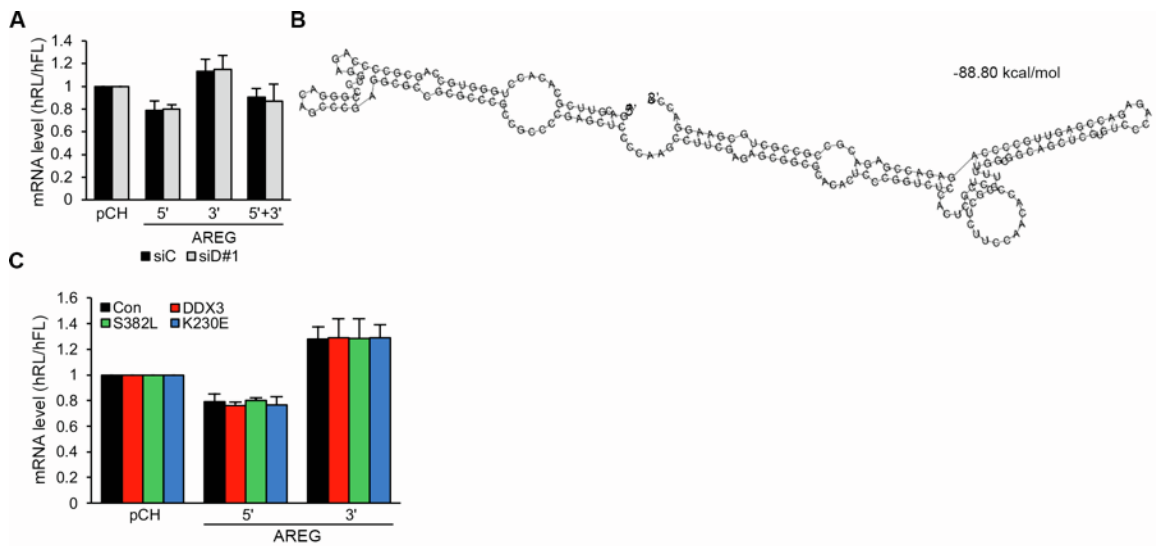

**Figure S4. DDX3 Knockdown Has no Effect on AREG Reporter mRNA Levels (Related to Figure 4)**

(A) RT-qPCR analysis of reporter mRNAs in the *in vivo* translation reactions (Figure 4B).

(B) RNAfold prediction for the secondary structure of *AREG* 5' UTR.

(C) RT-qPCR analysis of reporter mRNAs in the *in vivo* translation reactions (Figure 4C).

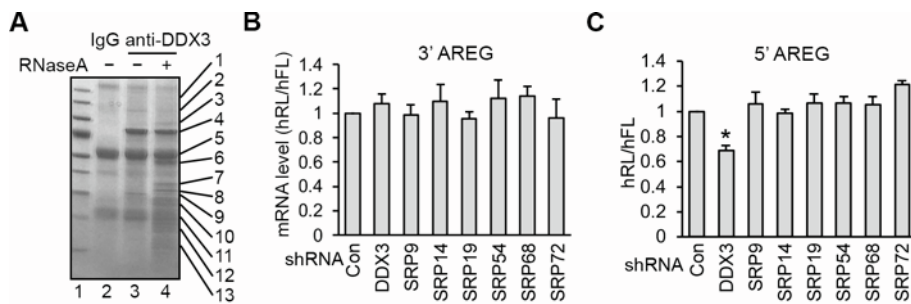

**Figure S5. The SRP is a DDX3-Interacting Partner and Has no Effect on AREG 5' UTR-Mediated Translation (Related to Figure 5)**

(A) Immunoprecipitation was performed using anti-DDX3 in SAS cell lysates. Coomassie blue staining shows IgG or DDX3 co-immunoprecipitates that were not treated or treated with RNase. Thirteen bands of RNase-treated immunoprecipitates (lane 4) were subjected to mass spectrometry analysis. The top 10 non-redundant proteins in each band are listed in Table S2.

(B) RT-qPCR analysis of reporter mRNAs in the *in vivo* translation reactions (Figure 5B).

(C) *In vivo* translation assay was performed as in Figure 5B except that the AREG 5' UTR reporter was used.

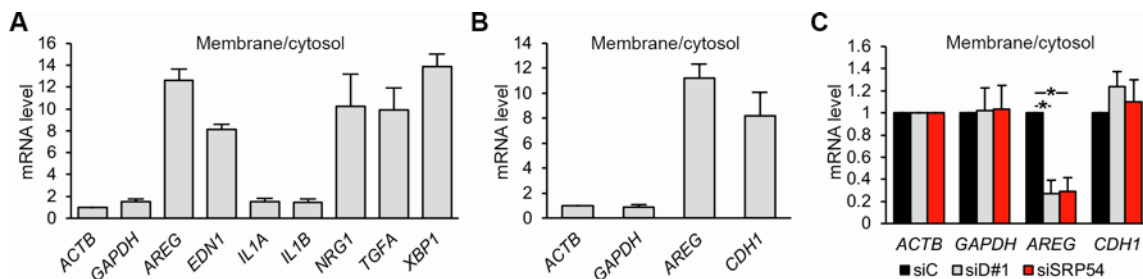

**Figure S6. Identification of Membrane-Associated mRNAs (Related to Figure 6)**

(A and B) Cell fractionation was performed as in Figure 6. RT-qPCR of the indicated transcripts in the membrane and cytosol fractions. Bar graphs shows relative membrane/cytosol ratios.

(C) RT-qPCR analysis of the indicated mRNAs in both the membrane and cytosol fractions of siRNA-transfected SAS cells. Bar graph shows the membrane-to-cytosol ratio of each mRNA in indicated knockdown (siD#1, siSRP54) cells relative to control (siC).
